# Supplementary material
Source: PubMed Central journal article supplement (PMC6557132)
Supplement: NIHMS1021426-supplement-supplemental.pdf [file NIHMS1021426-supplement-supplemental.pdf]

## **SUPPLEMENTAL DATA**

### **SUPPLEMENTAL METHODS**

#### ***Salmonella* Infection *In Vitro***

If desired macrophages were stimulated with 50  $\mu$ M FAC (ferric ammonium citrate), 50  $\mu$ M CORM-2 (CO-releasing molecule), 100  $\mu$ M NAC (N-acetyl-cystein), 10  $\mu$ M bilirubin (all obtained from Sigma). Concentrations were previously tested according to published data for CORM-2 (Sawle *et al.*, 2005, Murray *et al.*, 2012), Bilirubin (Wang *et al.*, 2004) and FAC (Sohn *et al.*, 2011) and the above stated concentrations were used for experiments.

#### **LDH Cytotoxicity Assay**

RAW264.7 cells were seed in a 96-well plate at a density of 20.000 cells/ well. Cells were maintained in complete DMEM with 1% heat-inactivated FCS without antibiotics for 6 hours. Afterward *Salmonella* infection was performed as described in Material and Methods. After 12 and 20 hrs cell supernatants were subjected to Pierce LDH cytotoxicity assay kit (Thermo Scientific) according to the manufacturer's protocol. Absorbance was measured at 490 nm and 680 nm and activity determined by subtracting the background (680 nm) from 490 nm and calculating % of cytotoxicity by normalizing the values to maximum LDH activity controls (lysed cells).

#### **Nramp1 Cell line**

RAW-264.7 murine macrophages originating from Nramp1-susceptible BALB/c mice were stably transfected with an expression vector containing Nramp1 in the sense direction (Nramp1 functional) or with a non-functional antisense construct (Nramp1 non-functional), as described previously (Atkinson *et al.*, 1999). *Salmonella in vitro* infections were exactly performed as described in Material and Methods.

#### **Primers and Probes for qRT-PCR**

The following primers and TaqMan probes were used for probe based real-time PCR (see Tabel S1).

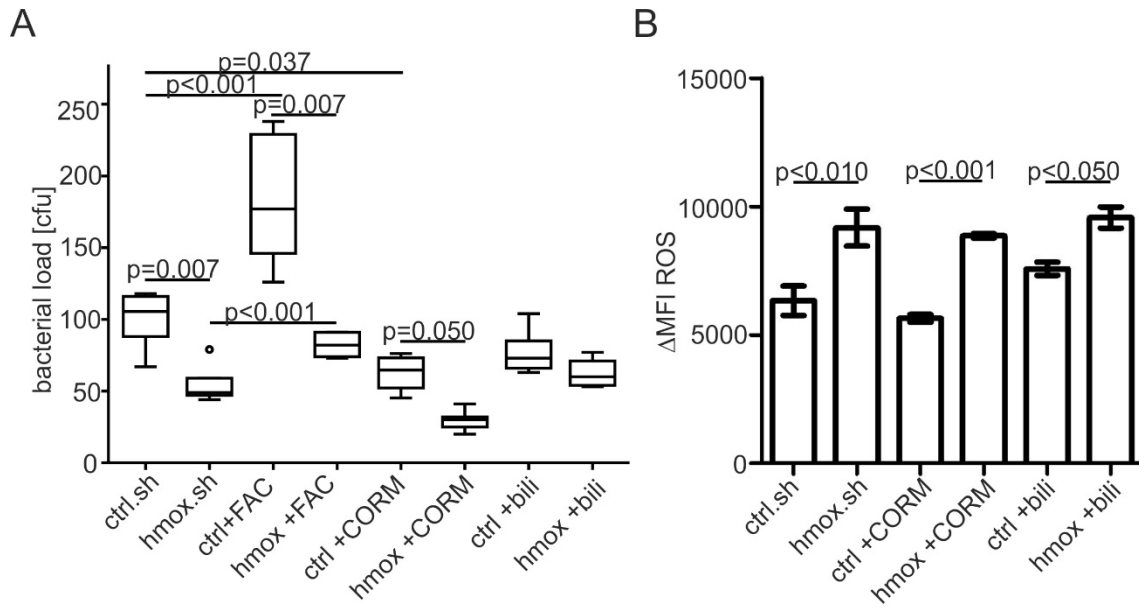

**Figure S1. Impact of heme catabolism products on bacterial burden and ROS production.**

(A-B) Ctrl.sh and hmox.sh cells infected with *Salmonella* Typhimurium wt, were treated with 100  $\mu$ M FAC, 50  $\mu$ M CORM-2 and 5  $\mu$ M bilirubin. (A) pathogen burden was determined after 20 hrs from the cell lysates (B) ROS levels (mean fluorescence intensity – MFI) were measured via FACS analysis in ctrl.sh and hmox.sh cells infected with *Salmonella* at 3 hrs post infection using CellROX™. (A-B) Data are shown as mean  $\pm$  SEM from at least three independent experiments performed in triplicate. P-Values are reported as determined by ANOVA using Bonferroni correction.

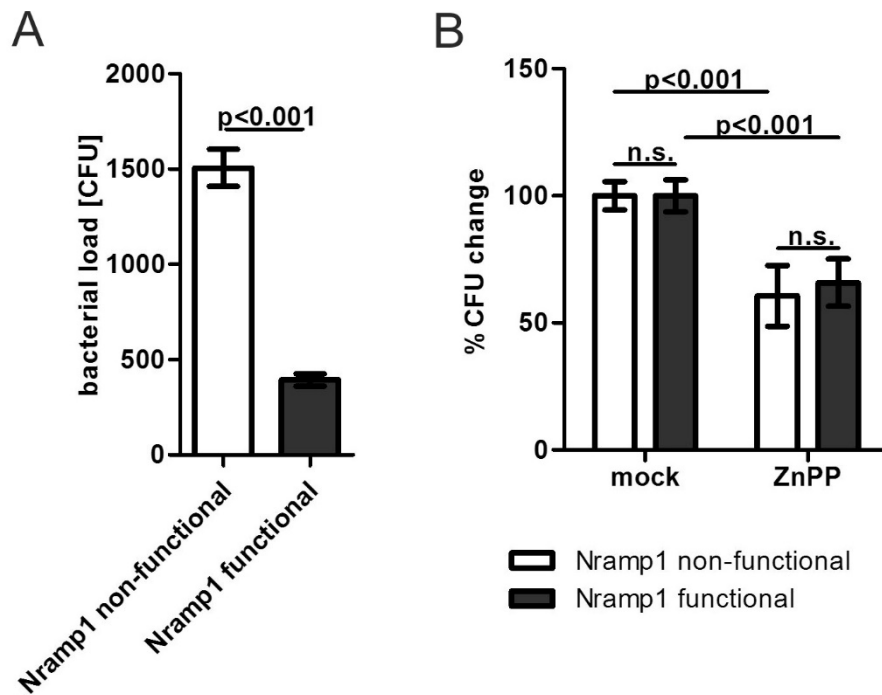

**Figure S2. Nramp1 functionality does not affect HO-1 mediated regulation of intracellular *Salmonella* replication**

(A-B) RAW 264.7 cells stably transfected with expression vector containing functional or non-functional Nramp1 were infected with *Salmonella* Typhimurium wt at a MOI of 10 as described in Material and Methods. (A) Influence of Nramp1 cells on *Salmonella* load (CFU) was measured. (B) Bacterial burden (CFU) was determined 20 hrs post-infection in the presence of 10  $\mu$ M HO-1 inhibitor ZnPP or solvent. For better comparability of the effects of Nramp1 on HO-1 mediated control of infection Nramp1 non-functional and Nramp1 functional bacterial loads, were normalized to 100%, in the absence of ZnPP (mock). (A-B) Data are shown as mean  $\pm$  SEM from at least three independent experiments. P-Values as determined by (A) t-test or (B) ANOVA using Bonferroni's correction.

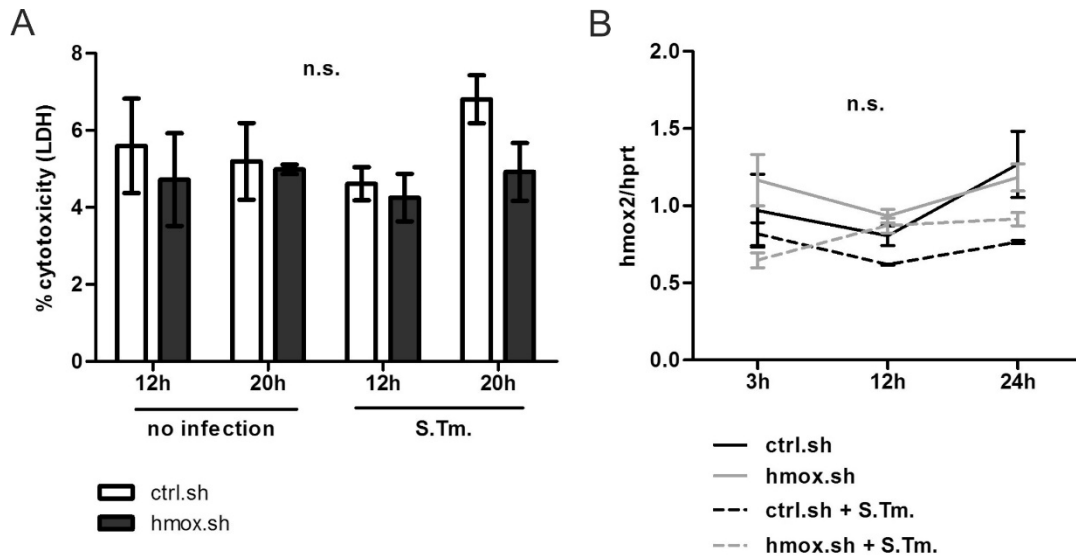

**Figure S3. Effect of *hmx1* knockdown on the cytotoxicity during *Salmonella* infection and *hmx2* expression.**

(A) Ctrl.sh and hmx.sh cells were infected with *Salmonella* Typhimurium wt or left untreated for 12 and 20 hrs. Thereafter cell supernatants were subjected to LDH cytotoxicity test and % cytotoxicity was calculated by normalizing to maximum LDH activity of lysed control cells. (B) Ctrl.sh (black line) and hmx.sh (grey line) macrophages infected with *Salmonella* (black or grey dashed line) were subjected to qRT-PCR at indicated time points. Expression of *hmx2* gene was normalized to *hprt* expression and fold-change relative to untreated controls is shown. (A-B) Error bars represent means  $\pm$  SEM, values were determined by ANOVA using Bonferroni's correction.

**Table S1. Primers used for qRT-PCR. Annealing temperature was 60°C for all primer pairs.**

| <b>Primer/ Probe Name</b> | <b>Sequence (5'-3')</b>     |
|---------------------------|-----------------------------|
| mu hmox1 fw               | GTGATGGAGCGTCCACAGC         |
| mu hmox1 probe            | CGACAGCATGCCCCAGGATTTGTC    |
| mu hmox1 rv               | TGGTGGCCTCCTTCAAGG          |
| mu hmox2 fw               | TGGCCCATGCTTATACTCGTT       |
| mu hmox2 rv               | GCTGGGAAGTTTTAGTGCCCT       |
| mu hprt fw                | GACCGGTCCCGTCATGC           |
| mu hprt probe             | ACCCGCAGTCCCAGCGTCGTC       |
| mu hprt rv                | TCATAACCTGGTTCATCATCGC      |
| mu IL-10 fw               | CCAGAGCCACATGCTCCTAGA       |
| mu IL-10 probe            | TGCGGACTGCCTTCAGCCAGG       |
| mu IL-10 rv               | TGGTCCTTTGTTTGAAAGAAAGTCT   |
| mu IL-6 fw                | TGTTCTCTGGGAAATCGTGGA       |
| mu IL-6 probe             | ATGAGAAAAGAGTTGTGCAATGGCAAT |
| mu IL-6 rv                | AAGTGCATCATCGTTGTTCATACA    |
| mu inos fw                | CAGCTGGGCTGTACAAACCTT       |
| mu inos probe             | CGGGCAGCCTGTGAGACCTTTGA     |
| mu inos rv                | CATTGGAAGTGAAGCGTTTCG       |
| mu lcn2 fw                | GCCTCAAGGACGACAACATCA       |
| mu lcn2 probe             | TTCTCTGTCCCCACCGACCAATGC    |
| mu lcn2 rv                | CACCACCCATTCAGTTGTCAAT      |
| mu p47phox fw             | GAGGCGGAGGATCCGG            |
| mu p47phox probe          | CAACTACGCAGGTGAACCGTATGTAAC |
| mu p47phox rv             | TCTTCAACAGCAGCGTACGC        |
| mu tfr1 fw                | CGCTTTGGGTGCTGGTG           |
| mu tfr1 probe             | CCCACACTGGACTTCGCCGCA       |
| mu tfr1 rv                | GGGCAAGTTTCAACAGAAGACC      |
| mu tnfa probe             | CTCAGATCATCTTCTCAAATTCGAGT  |
| mu tnfa rv                | TTGCTACGACGTGGGCTACA        |
| mu tnfa fw                | TTCTATGGCCCAGACCCTCA        |

## REFERENCES

- Atkinson, P.G. and Barton, C.H. (1999). High level expression of Nramp1G169 in RAW264.7 cell transfectants: analysis of intracellular iron transport. *Immunology* **96**, 656-662.
- Murray, T.S., Okegbe, C., Gao, Y., Kazmierczak, B.I., Motterlini, R., Dietrich, L.E. and Bruscia, E.M. (2012). The carbon monoxide releasing molecule CORM-2 attenuates *Pseudomonas aeruginosa* biofilm formation. *PLoS one* **7**, e35499.
- Sawle, P., Foresti, R., Mann, B.E., Johnson, T.R., Green, C.J. and Motterlini, R. (2005). Carbon monoxide-releasing molecules (CO-RMs) attenuate the inflammatory response elicited by lipopolysaccharide in RAW264.7 murine macrophages. *British journal of pharmacology* **145**, 800-810.
- Sohn, Y.S., Mitterstiller, A.M., Breuer, W., Weiss, G. and Cabantchik, Z.I. (2011). Rescuing iron-overloaded macrophages by conservative relocation of the accumulated metal. *British journal of pharmacology* **164**, 406-418.
- Wang, W.W., Smith, D.L. and Zucker, S.D. (2004). Bilirubin inhibits iNOS expression and NO production in response to endotoxin in rats. *Hepatology* **40**, 424-433.
